# Supplementary material
Source: PubMed Central journal article supplement (PMC5357601)

Fig. 1i (LIFR, BR1-3)

Fig. 1k (LIFR, BR1-3)

Fig. 2e (AcH3)

Fig. 2e (LIFR)

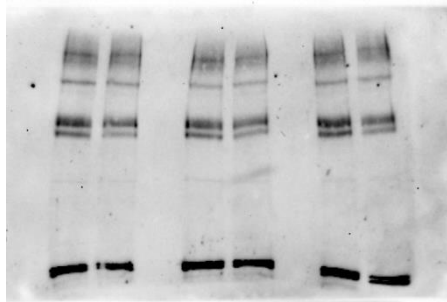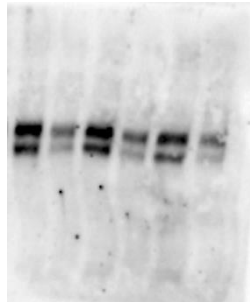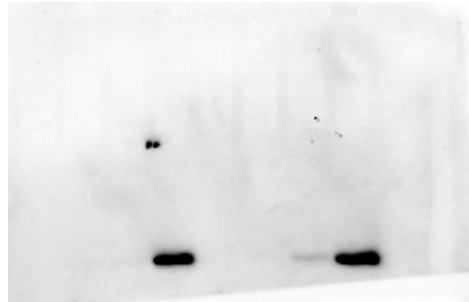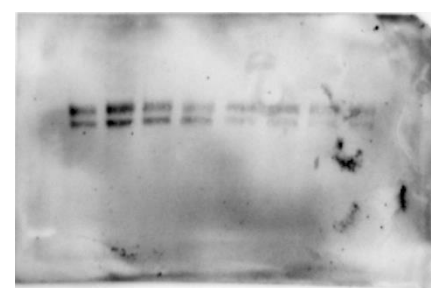

Fig. 3a (LIFR)

Fig. 3c (LIFR)

Fig. 3e (LIFR)

Fig. 3g (LIFR)

Fig. 4b (p53)

Fig. 4b (c-Myc)

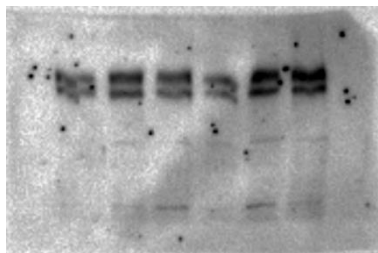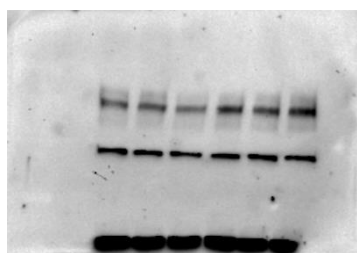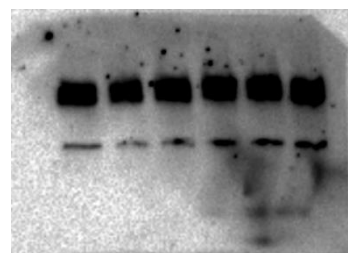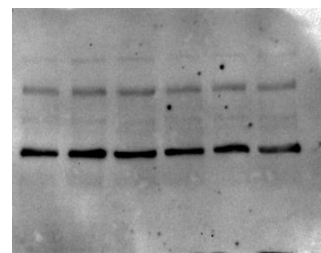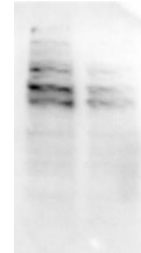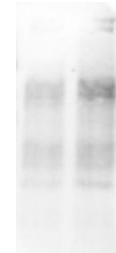

Fig. 4b (pSrc)

Fig. 5c (LIFR)

Supp. Fig. 4a (LIFR)

Supp. Fig. 4c (LIFR)

Supp. Fig. 4e (LIFR)

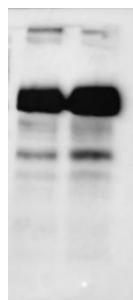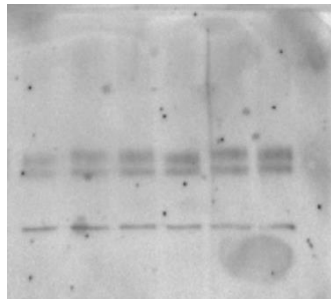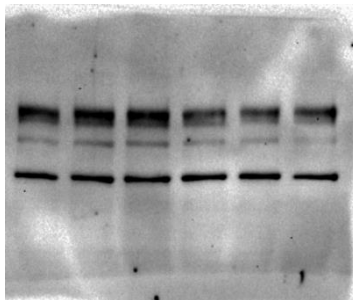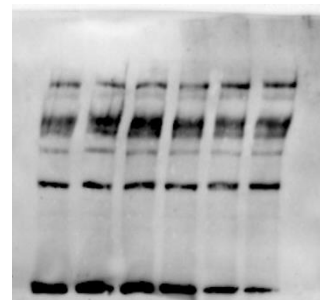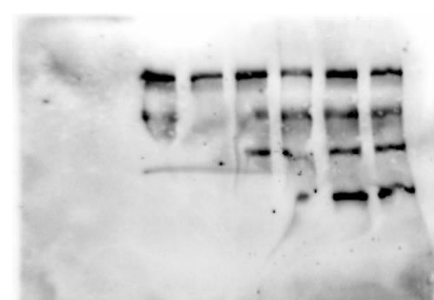

Supp. Fig. 4g (LIFR)

Supp. Fig. 4l (LIFR)

Supp. Fig. 5a (pStat3)

Supp. Fig. 7c (pAkt)

Supp. Fig. 7e (pErk)

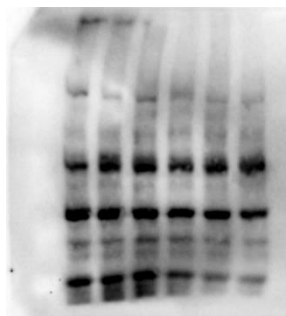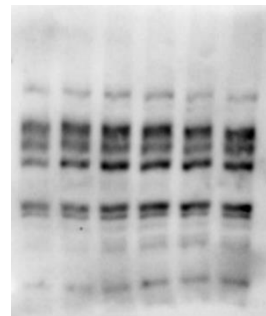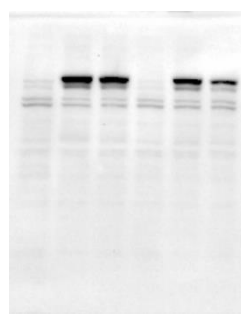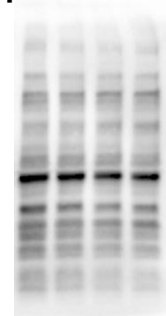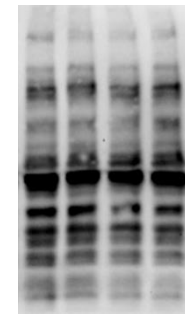

Supplement: NIHMS810262-supplement-9.pdf [file NIHMS810262-supplement-9.pdf]
