# Supplementary material
Source: PubMed Central journal article supplement (PMC5357601)

**a**

| Dormancy/<br>quiescence<br>genes | Gene name                                    | Citations                                |
|----------------------------------|----------------------------------------------|------------------------------------------|
| <b>TSP1</b>                      | Thrombospondin1                              | Almog, 2009; Kim, 2012                   |
| <b>TPM1</b>                      | Tropomyosin1                                 | Almog, 2009; Kim, 2012                   |
| <b>AMOT</b>                      | Angiomotin                                   | Almog, 2009; Kim, 2012                   |
| <b>TGF-<math>\beta</math>2</b>   | Transforming growth factor- $\beta$ 2        | Almog, 2009; Bragado, 2013               |
| <b>P4HA1</b>                     | Prolyl 4 hydroxylase $\alpha$ 1              | Almog, 2009; Kim, 2012                   |
| <b>H2BK</b>                      | Histone cluster 1 H2BK                       | Almog, 2009; Kim, 2012                   |
| <b>IGFBP5</b>                    | Insulin-like growth factor binding protein 5 | Almog, 2009; Kim, 2012                   |
| <b>miR-190</b>                   | microRNA-190                                 | Almog, 2013                              |
| <b>Pdcd4</b>                     | Programmed cell death 4                      | Oki, 2014                                |
| <b>Selenbp1</b>                  | Selenium binding protein 1                   | Oki, 2014                                |
| <b>p27</b>                       | Cyclin-dependent kinase inhibitor 1B         | Bragado, 2013; Oki, 2014                 |
| <b>QSOX1</b>                     | Quiescin                                     | Pernodet, 2012                           |
| <b>p53</b>                       | Tumor protein p53                            | Holmgren, 1998; Kim, 2012;<br>Adam, 2009 |
| <b>c-MYC</b> ↓                   | Proto-oncogene c-Myc                         | Shachaf, 2004; Oki, 2014                 |
| <b>SRC</b> ↓                     | Proto-oncogene Src                           | Barkan, 2010; El Touny, 2014             |

**b**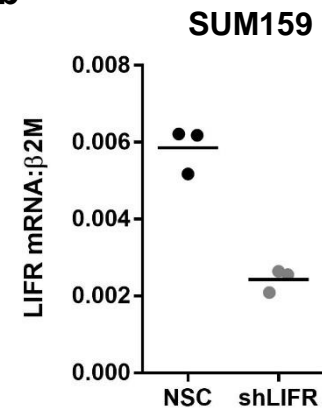

Supplement: NIHMS810262-supplement-6.pdf [file NIHMS810262-supplement-6.pdf]
