# Supplementary material
Source: PubMed Central journal article supplement (PMC5357601)

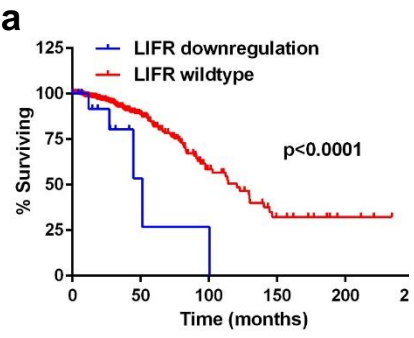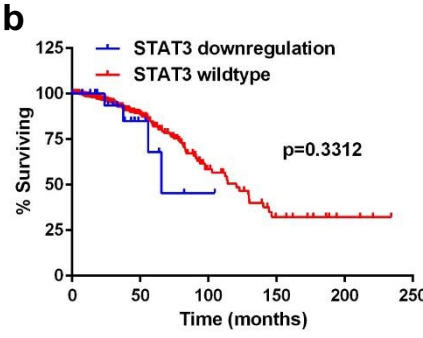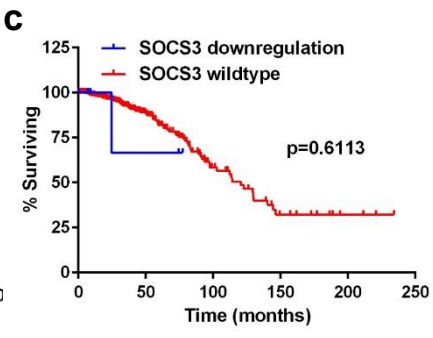

**d**

| gene A | gene B | Co-occurrence p-Value |
|--------|--------|-----------------------|
| LIFR   | STAT3  | *0.043                |
| STAT3  | SOCS3  | ***0.0009             |

Supplement: NIHMS810262-supplement-1.pdf [file NIHMS810262-supplement-1.pdf]

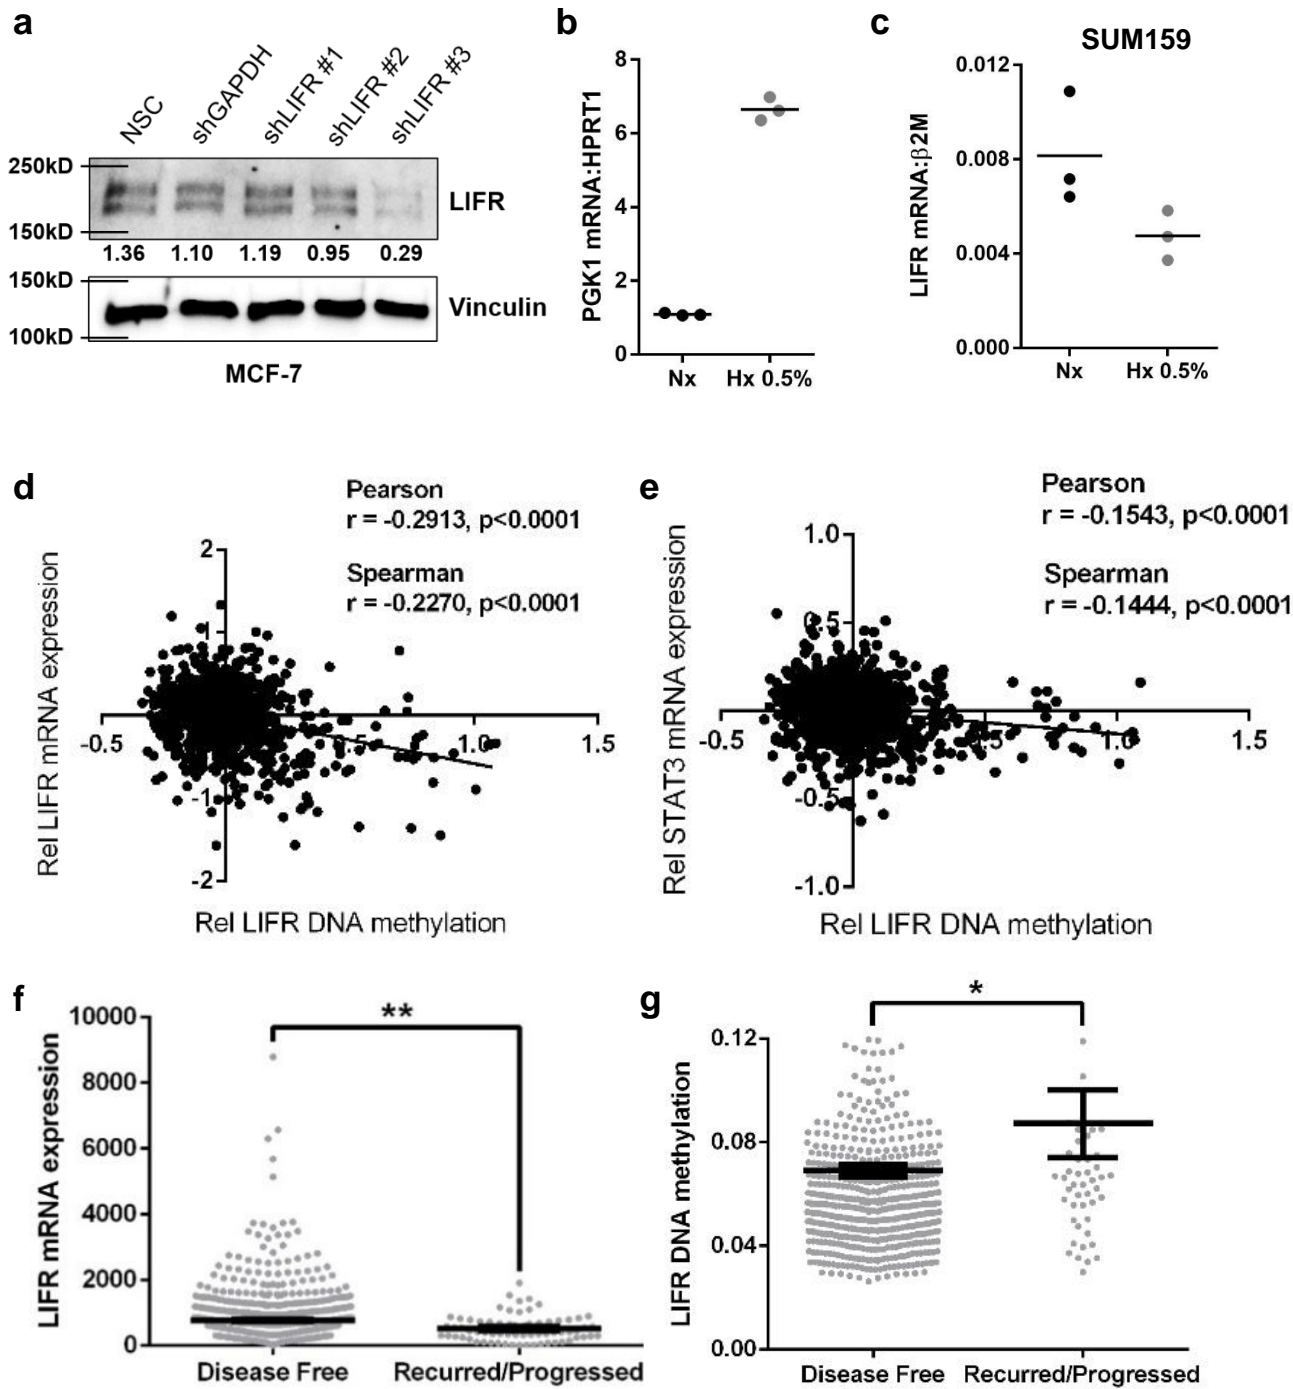

Supplement: NIHMS810262-supplement-2.pdf [file NIHMS810262-supplement-2.pdf]

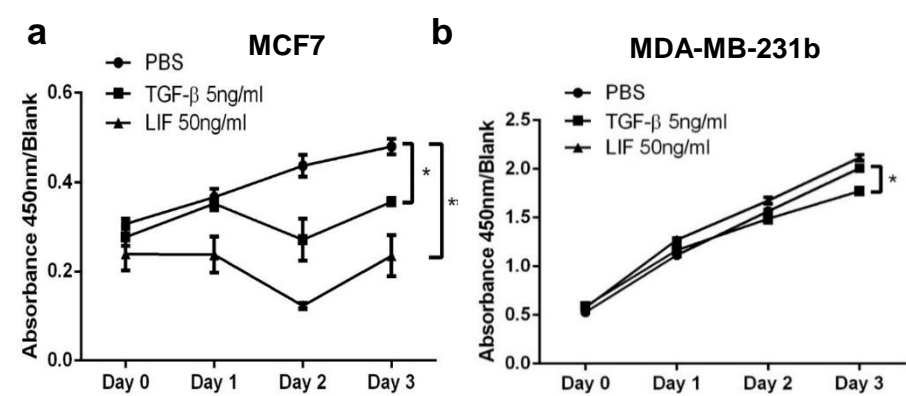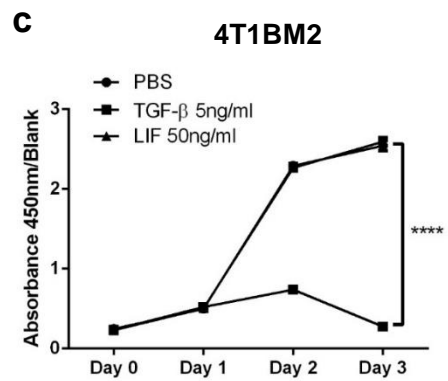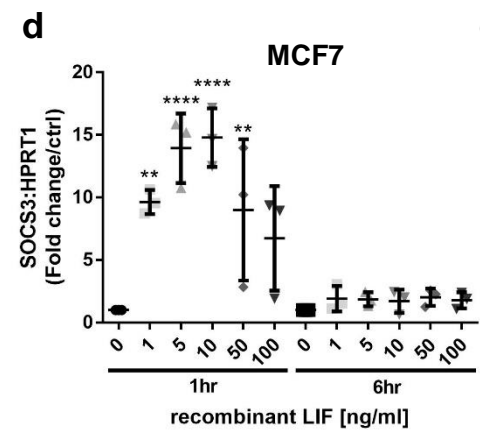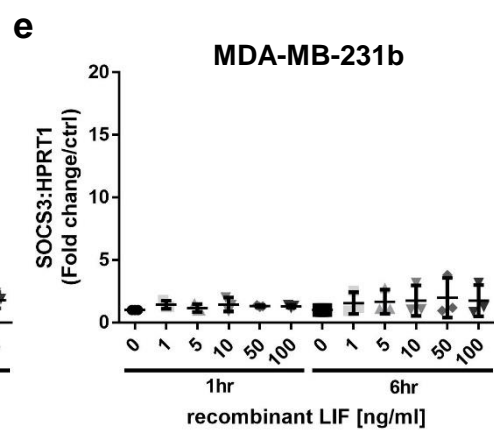

Supplement: NIHMS810262-supplement-3.pdf [file NIHMS810262-supplement-3.pdf]

## Low metastatic potential

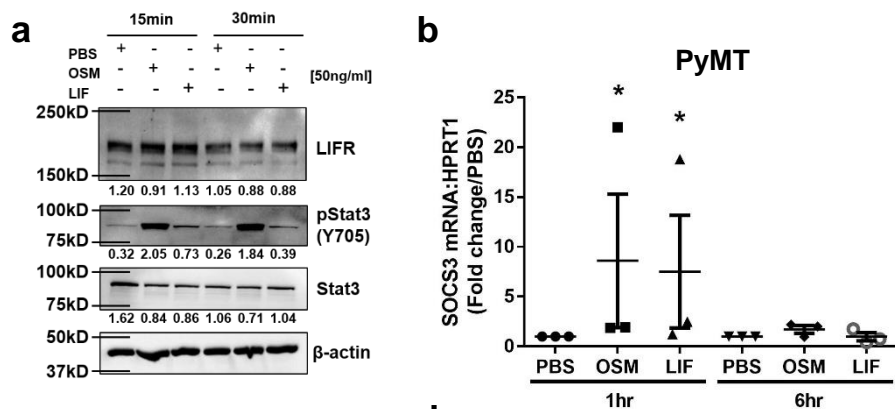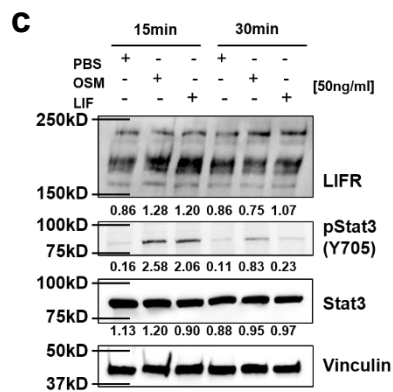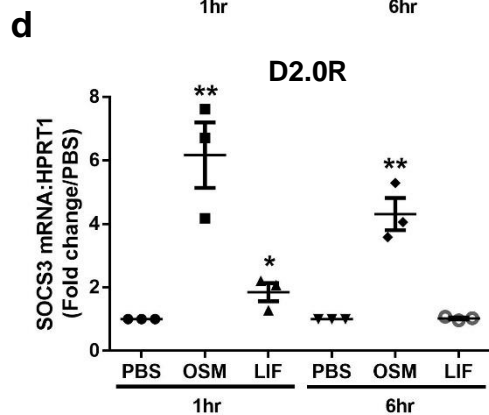

## High metastatic potential

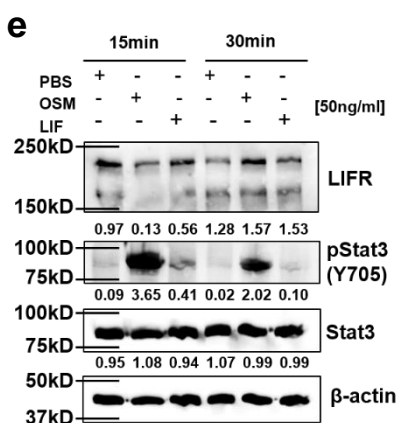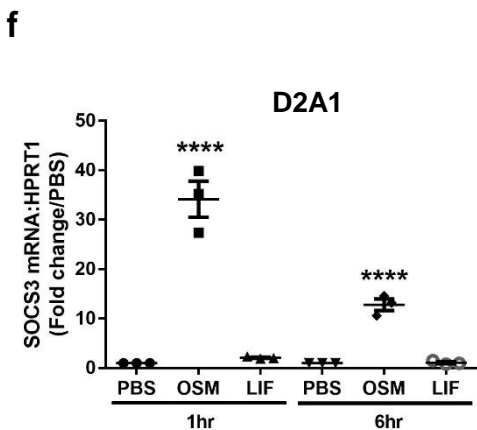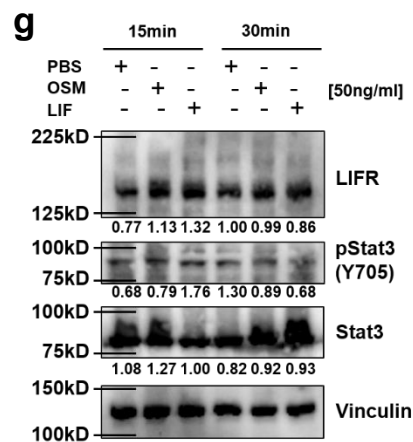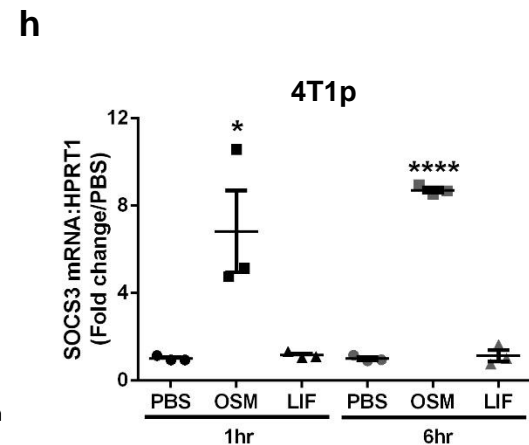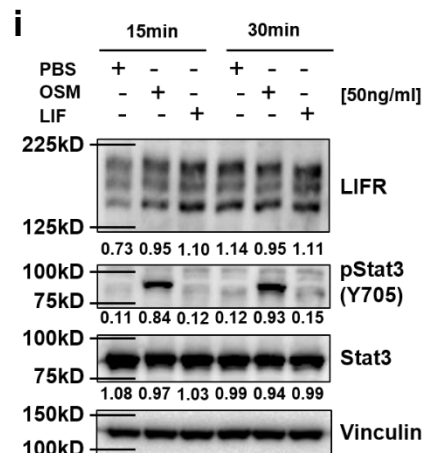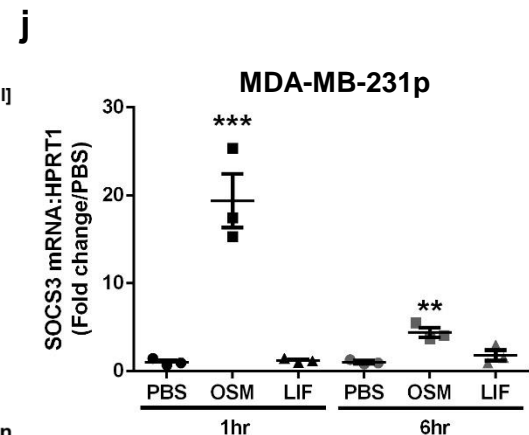

Supplement: NIHMS810262-supplement-4.pdf [file NIHMS810262-supplement-4.pdf]

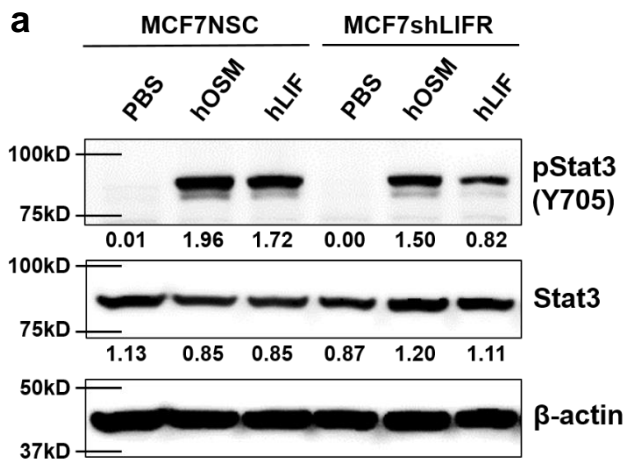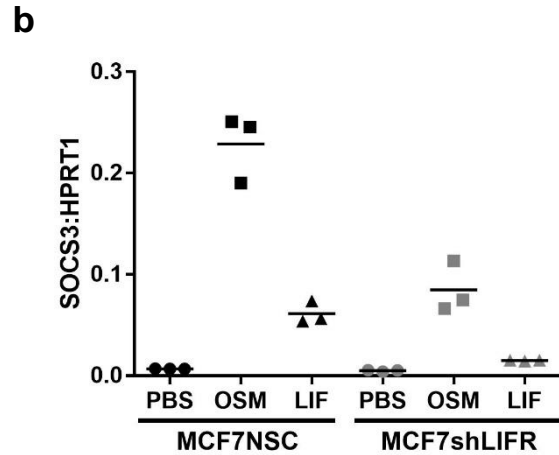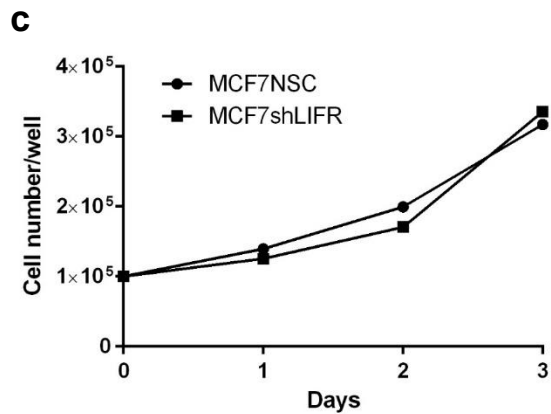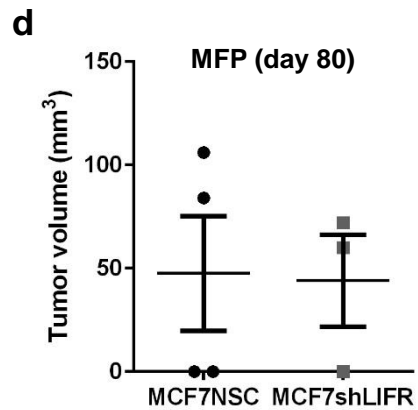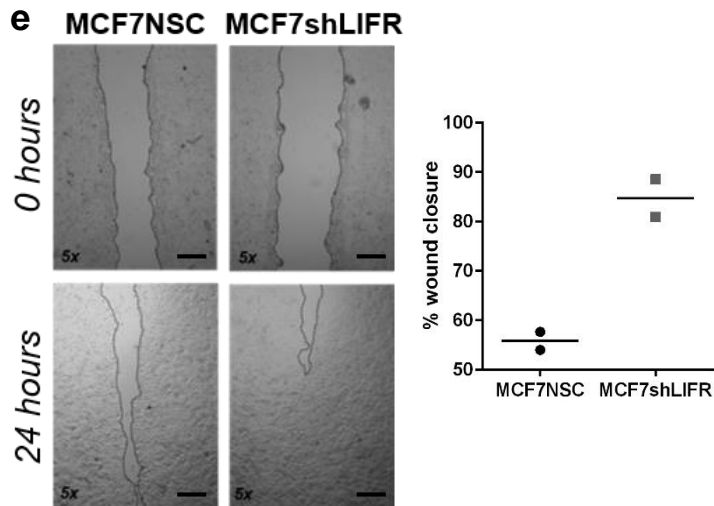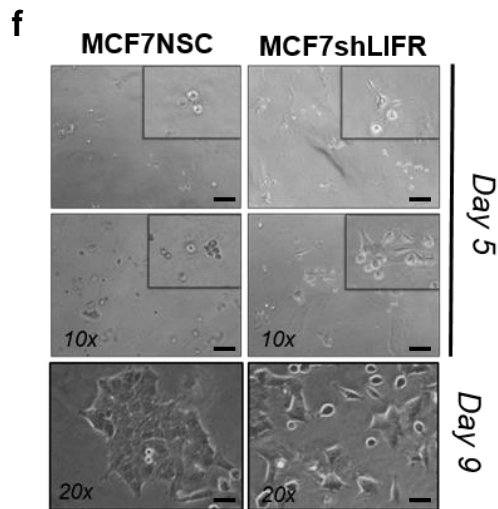

Supplement: NIHMS810262-supplement-5.pdf [file NIHMS810262-supplement-5.pdf]

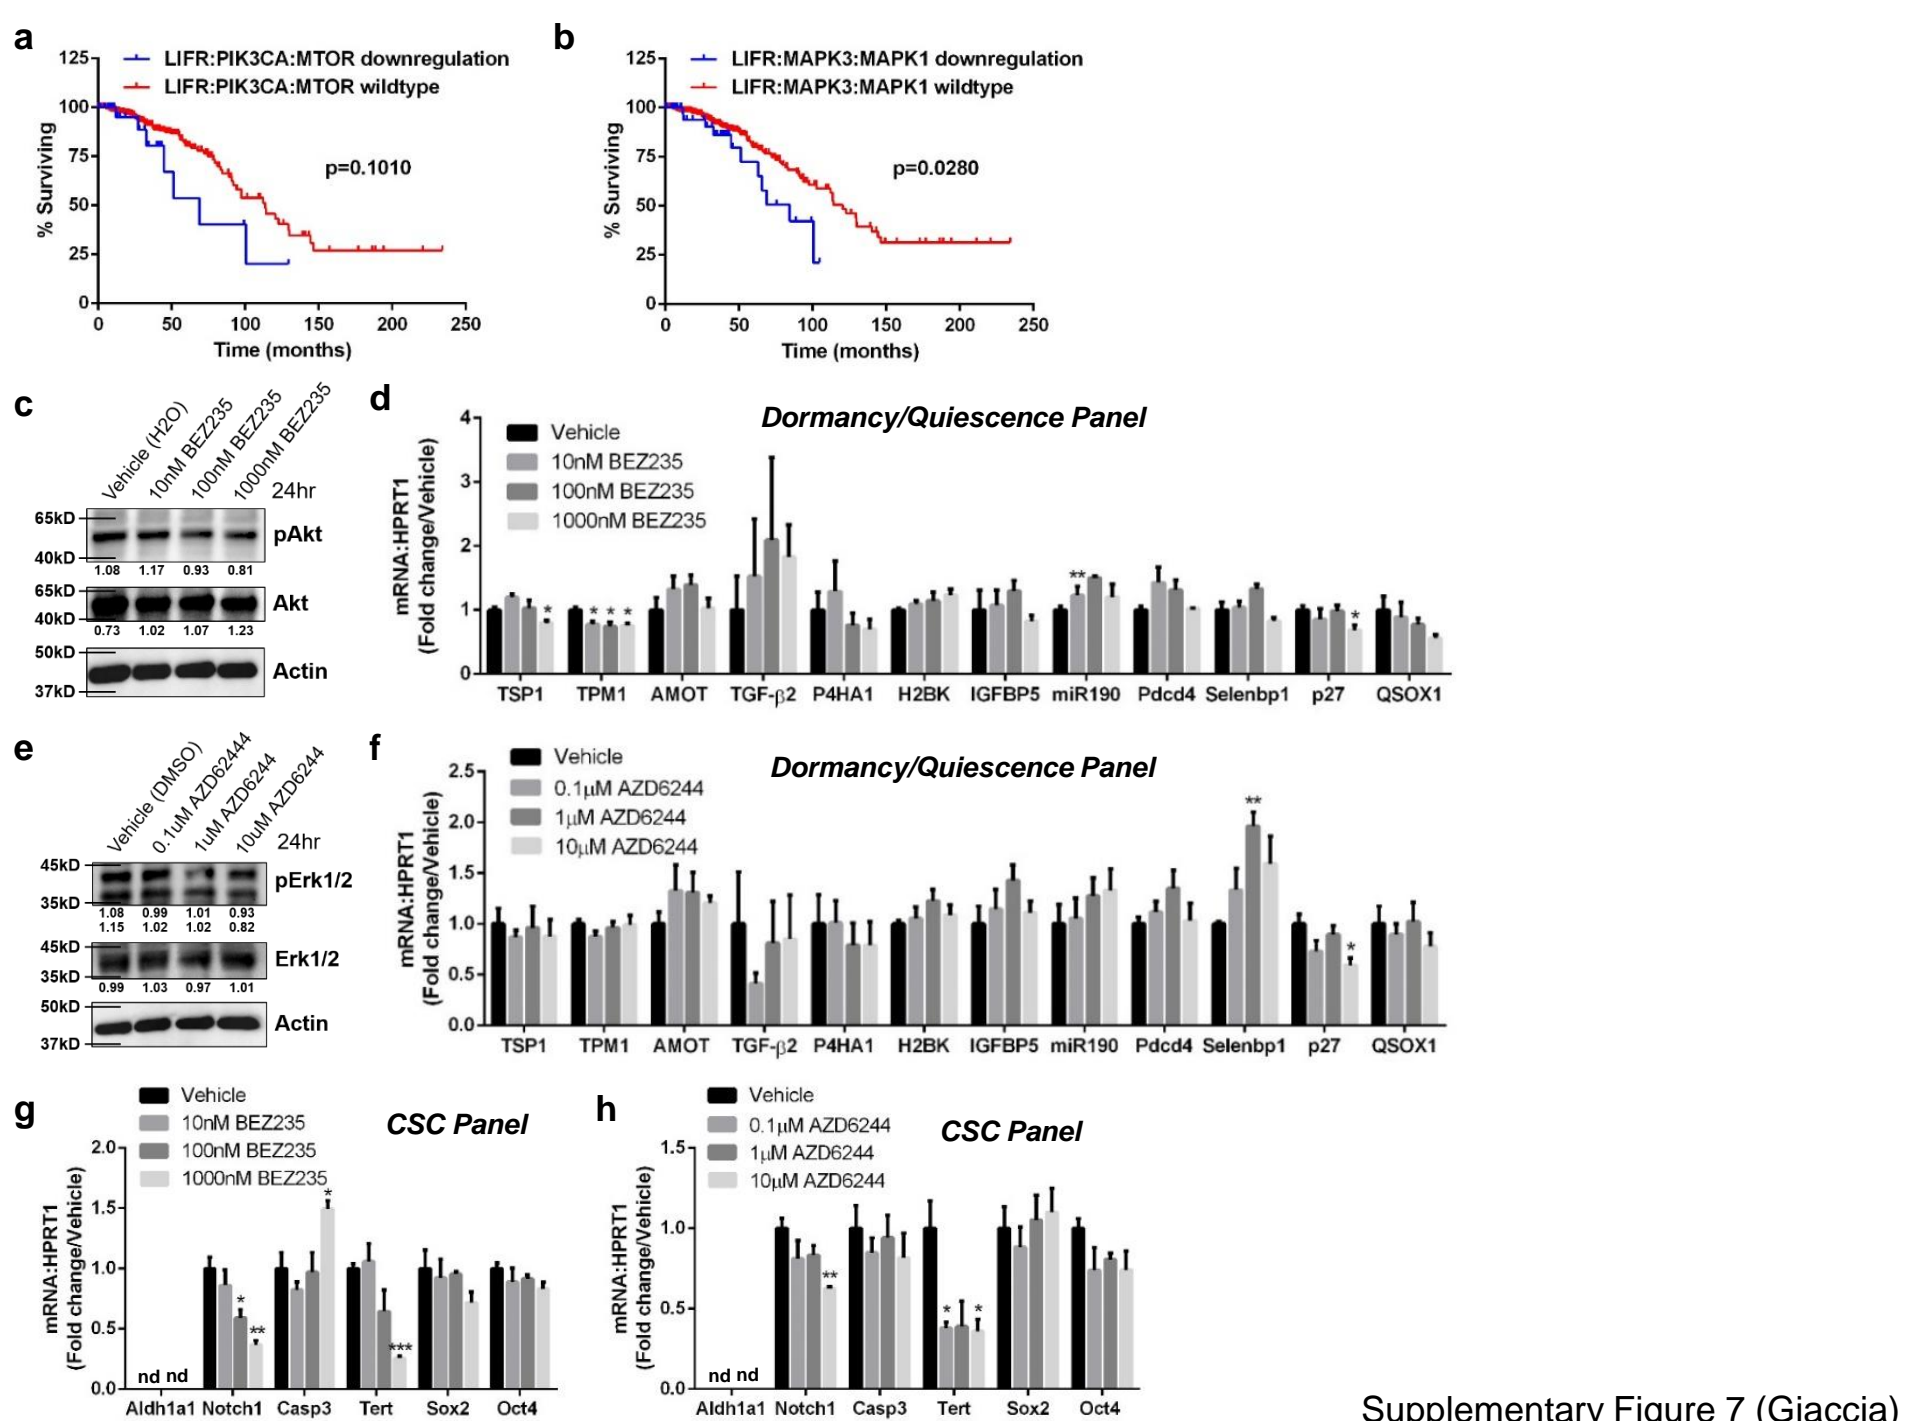

Supplement: NIHMS810262-supplement-7.pdf [file NIHMS810262-supplement-7.pdf]

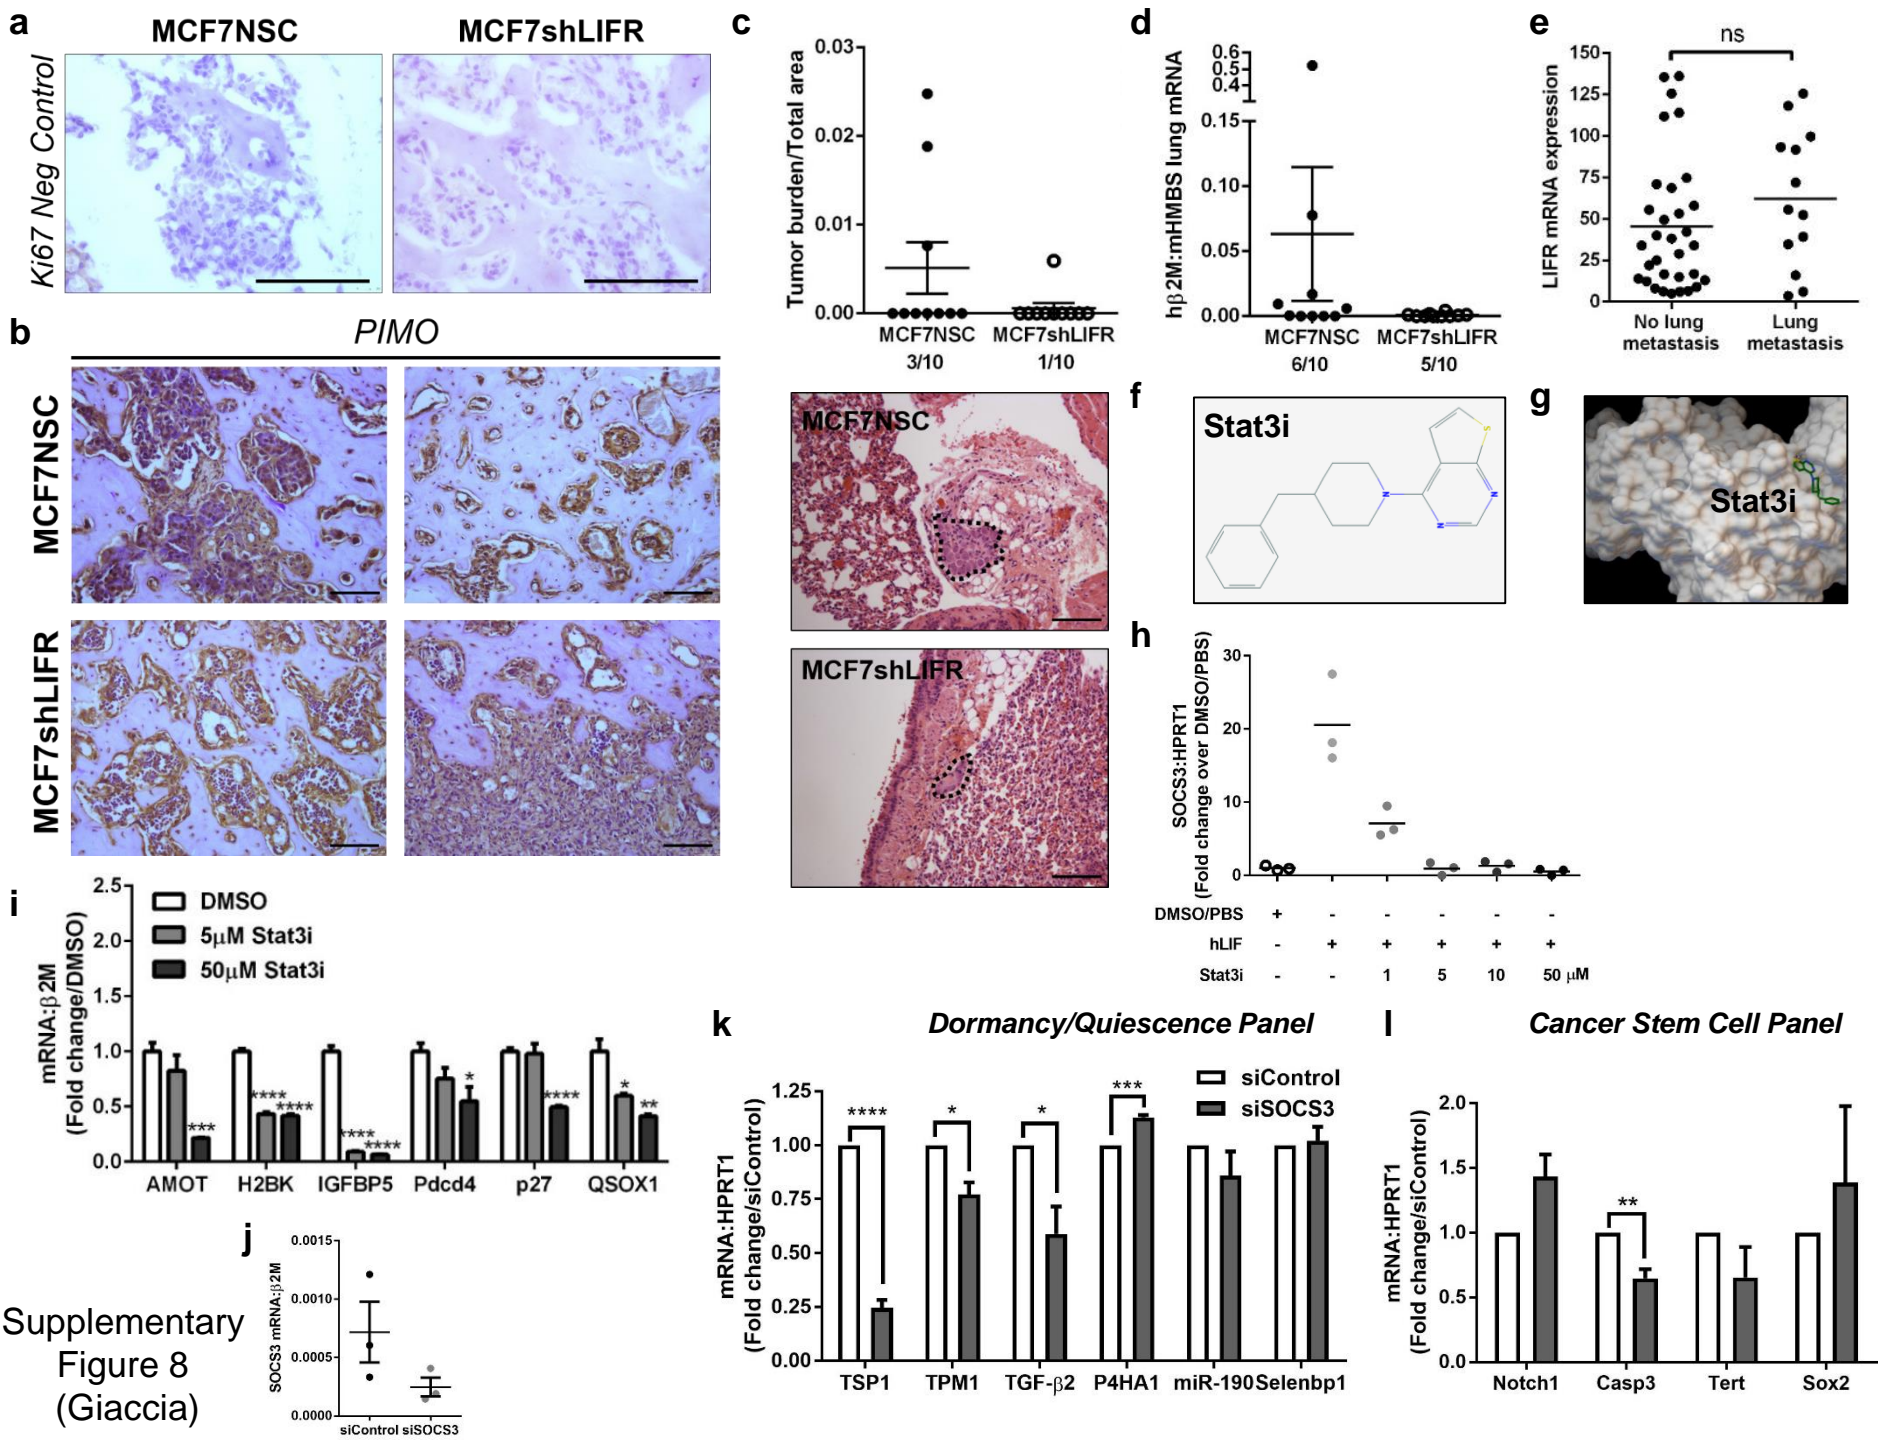

Supplement: NIHMS810262-supplement-8.pdf [file NIHMS810262-supplement-8.pdf]
